# Supplementary material for: Gut Microbiota Mediate the Metabolism of Colonic Prostaglandins
Source: Research Square preprint supplement (doi:10.21203/rs.3.rs-8856024/v1), 2026-02-20
Supplement: Supplementary file 1 [file 659a87129f1a4236e287d81a.xlsx]

## Sheet: Fig.1cde
Concentrations of lipid metabolites in mouse colon (ng/g in colon)
Group	Mouse#	PGE2	PGB2	PGE3	PGD2	PGD3	TXB2	15-keto PGF2α	6-keto PGF1α	PGF2α	10,11-DiHDPA	10,11-EpDPA	11,12-DHET	11,12-DiHETE	11,12-EET	11,12-EpETE	11-HETE	12,13-DHOME	12,13-EpOME	12-HETE	13,14-DiHDPA	13,14-EpDPA	13-HODE	14,15-DHET	14,15-DiHETE	14,15-EET	14,15-EpETE	15-HETE	16,17-DiHDPA	16,17-EpDPA	17,18-DiHETE	17,18-EpETE	17-HDHA	18-HEPE	19,20-DiHDPA	19,20-EpDPE	19-HETE	20-carboxy-AA	22-HDoHE	5,6-DHET	5,6-EET *	5-HETE	7,8-DiHDPA	7,8-EpDPA	8,9-DHET	8,9-EET	8isoPGF2a	9,10-DHOME	9,10-EpOME
SPF	1	2364.01	27.49	295.275	1752.63	31.01	336.045	8926.92	366.51	541.8	4.53	10.035	24.205	0.94	12.875	6.32	435.73	359.975	55.07	1148.51	9.03	7.74	2004.7	21.22	50.46	24.405	3.235	331.295	10.585	6.285	603.865	16.6	219.57	92.755	45.32	44.94	4.41	4.63	1.84	10.06	11064.4	27.96	7.555	19.71	23.025	58.08	13.735	118.88	116.17
	2	2395.98	26.005	454.05	1295.83	23.975	258.585	5878.48	320.24	324.22	4.25	16.22	19.39	0.635	18.74	10.565	329.62	572.865	226.48	496.075	7.87	9.81	1959.4	19.17	49.845	31.78	7.355	240.76	11.495	10.125	514.005	29.62	186.445	199.91	55.82	75.005	4.54	5.36	3.52	13.72	15271.8	31.245	6.765	29.465	21.71	75.7	9.655	189.005	318.135
	3	2301.23	18.195	281.935	1519.17	22.705	218.9	6800.94	288.555	555.625	3.165	14.6	17.055	0.655	18.04	10.99	462.445	603.665	123.835	785.67	5.995	9.51	3155.91	14.15	44.64	32.83	6.255	312.26	7.88	8.3	492.515	24.05	203.505	143.06	39.85	59.75	4.51	4.63	2.47	10.835	16735.6	29.82	5.435	27.665	17.055	56.875	11.24	203.18	247.29
	4	2140.81	24.41	203.605	1440.37	17.54	147.75	15383.6	356.07	673.485	5.365	18.53	25.61	1.095	21.705	10.29	264.525	736.09	175.88	809.39	10.14	13.095	1977.99	21.64	73.97	31.085	5.215	192.63	14.01	9.93	807.775	23.93	143.17	101.58	57.825	69.19	3.46	4.295	2.265	12.725	14512	17.135	8.84	36.945	24.885	60.91	13.035	250.7	328.12
	5	1186.79	11.19	168.545	766.205	12.015	84.53	5108.98	192.775	372.64	5.005	25.01	17.835	0.645	26.745	10.62	461.255	535.495	111.655	474.735	9.355	17.25	1866.38	13.495	50.77	49.375	5.955	280.81	12.085	15.93	363.48	21.31	180.67	133.3	53.595	107.635	4.89	6.46	4.72	16.425	25652	36.085	9.315	49.965	20.535	68.36	7.92	167.925	208.045
	6	1201.71	13.15	144.245	347.94	9.61	261.49	9909.39	328.68	736.15	7.25	44.945	31.495	1.13	56.71	28.835	288.635	1403.73	497.37	482.22	15.935	29.82	2863.48	30.35	79.945	103.38	15.68	185.48	20.63	30.415	648.64	73.21	193.39	138.82	70.335	196.285	6.99	22.095	4.05	34.93	42093.9	32.915	12.825	84.32	34.155	135.07	17.535	463.56	907.625
	7	1818.12	22.385	156.68	1191.01	15.435	213.96	16979.3	361.405	895.005	6.83	25.185	22.46	0.615	23.725	13.32	372.92	742.25	521.79	839.735	12.55	15.585	2486.97	18.415	40.44	43.715	7.56	262.62	14.48	15.83	345.99	33.12	194.295	136.585	50.205	127.455	3.71	6.485	3.71	15.275	30309.1	26.99	11.3	50.75	26.535	71.525	18.325	256.59	754
	8	2009.78	20.075	295.21	1302.35	28.295	289.15	8632.01	383.49	708.405	5.825	66.225	21.93	1.03	59.955	30.35	542.89	1166.12	596.175	1080.39	12.05	38.36	7314.05	18.6	66.975	92.725	15.74	358.33	15.725	35.435	656.515	42.645	352.02	373.26	69.71	232.735	5.79	14.255	6.305	28.46	41801.2	68.555	10.945	115.71	22.41	179.25	17.58	416.59	1394.26
	9	2068.84	18.36	217.01	1013.33	16.39	236.67	14680.7	335.08	758.49	5.34	21.67	20.82	0.81	18.76	16.71	426.03	1085.42	434.69	846.765	10.895	13.695	3618.32	18.615	68.365	39.9	9.525	315.99	17.6	12.79	600.025	45.215	190.61	247.125	64.035	126.62	3.73	7.365	3.505	10.41	28178.3	29.37	8.565	38.94	21.725	69.1	16.34	324.41	678.78
	10	1385.59	7.07	228.81	447.72	10.235	156.14	6054.4	312.84	457.195	6.63	57.97	30.82	1.155	60.9	22.395	361.595	908.635	304.97	490.345	14.065	36.015	3658.61	26.67	84.07	103.575	16.52	263.725	16.635	30.12	660.235	46.79	249.86	278.19	74.27	230.955	5.61	9.19	3.675	34.105	45310.5	54.49	10.54	98.57	33.255	144.915	12.43	309.21	615.735
	11	1589.37	12.425	179.335	1122.45	20.2	126.33	7438.58	269.055	508.155	4.92	15.21	17.3	0.64	13.9	6.53	509.755	487.415	77.65	842.705	9.54	9.785	2588.35	16.16	44.37	24.5	3.67	330.085	12.085	9.625	407.655	11.99	202.755	125.8	51.07	80.355	3.09	5.47	2.885	9.52	9459.4	30.3	8.71	31.18	19.58	39.575	10.665	154.96	156.79
	12	1175.47	9.26	173.115	709.17	15.355	87.42	7529.48	241.95	475.125	6.99	23.12	24.555	0.73	19.68	8.96	439.645	834.01	140.55	441.575	13.02	13.67	3266.11	19.27	67.265	32.72	3.88	278.06	16.68	12.95	379.075	17.92	162.58	135.49	72.385	106.895	2.97	9.235	3.765	13.385	14536.2	22.995	13.05	41.155	28.87	55.065	10.115	261.59	332.96
GF	13	1486.95	12.82	190.655	914.335	19.82	222.47	4686.19	279.26	670.945	3.93	16.52	15.975	0.62	21.57	14.53	485.1	540.645	346.795	464.255	7.56	10.475	2765.3	15.845	51.24	37.59	7.5	317.545	11.415	10.005	460.64	34.62	143.68	125.895	50.455	93.325	4.15	6.635	1.58	11.16	23116	31.15	9.395	32.235	20.225	47.41	14.71	207.1	656.74
	14	1536.68	13.23	202.095	674.345	21.645	240.76	7210.89	421.935	772.525	6.2	102.23	24.715	1.025	112.38	44.9	768.98	974.32	1632.46	783.875	12.275	59.245	19171.2	21.605	68.82	155.05	24.205	563.975	14.97	52.385	685.525	58.75	299.59	421.63	74.88	360.38	7.3	17.385	7.265	51.115	34435.1	124.8	11.86	177.105	31.2	273.14	27.32	495.445	4019.93
	15	616.455	3.56	91.625	174.495	4.8	109.655	4728.16	223.44	800.59	4.46	30.86	15.32	0.465	37.78	17.565	469.655	388.665	309.245	252.75	9.235	19.95	1561.94	14.055	39.11	64.79	8.495	279.9	12.475	21.515	446.4	30.555	125.795	#VALUE!	65.225	129.69	5.76	18.675	2.355	22.82	26088.5	29.905	11.025	60.855	18.84	72.48	18.07	169.85	556.895
	16	1284.45	6.64	156.345	336.085	9.255	196.425	4770.49	576.28	728.515	5.66	36.36	19.7	0.62	45.23	18.235	543.22	725.35	613.035	526.755	11.04	24.23	3394.2	19.615	52.19	77.22	9.785	334.47	15.05	21.96	630.665	37.105	250.135	159.535	76.825	149.8	6.755	20.785	4.37	29.05	21878.7	50.495	12.375	67.225	26.96	89.085	21.495	338.175	1225.24
	17	545.855	2.27	92.41	279.6	11.345	85.03	3293.28	240.99	472.06	5.205	53.89	17.82	0.715	62.845	30.07	410.82	786.825	673.105	356.205	10.485	33.095	4779.77	16.595	48.055	106.18	15.485	250.73	14.47	33.085	598.87	57.465	185.955	263.735	85.05	220.86	7.04	22.31	4.05	31.875	26707.9	50.63	10.825	94.69	23.555	139.28	10.68	378.45	1558.8
	18	799	4.525	132.585	415.975	12.685	101.32	4466.27	264.1	654.475	4.085	23.52	12.855	0.465	30.04	14.18	421.145	474.185	350.215	184.255	7.93	16.445	1646.17	12.155	40.83	49.49	7.115	221.09	10.865	14.975	480.515	24.64	102.19	102.365	63.915	114.125	5.16	11.69	2.315	13.735	14040.8	21.85	8.635	48.535	18.9	42.37	15.105	170.445	636.215
	19	913.045	4.6	119.62	397.95	11.63	141.155	6746.01	301.225	937.425	5.37	29.945	19.735	0.75	42.995	16.56	531.16	1169.04	456.39	440.65	10.805	22.535	3299.86	20.23	67.555	70.19	8.49	336.77	17.965	19.16	655.705	27.545	156.215	#VALUE!	89.355	184.265	5.475	14.835	2.1	18.58	30409.5	45.62	11.595	54.035	25.65	81.495	19.64	503.235	1077.93
	20	439.44	3.82	84.38	97.485	3.625	79.705	6952.42	101.045	616.97	6.43	47.725	23.765	0.755	54.015	14.015	482.825	767.455	571.455	242.265	12.7	27.98	4341.31	20.78	63.685	82.95	10.43	285.465	17.02	26.53	592.345	39.25	151.795	131.105	77.28	235.595	5.74	28.465	3.675	28.235	36772.1	46.63	16.105	81.88	31.39	115.955	11.36	358.46	1141.67
	21	301.46	2.36	36.67	98.38	3.895	94.14	3060.89	145.47	397.83	5.055	42.185	22.05	0.6	50.19	18.92	544.645	469.36	415	239	11.045	25.665	3174.95	17.305	40.205	84.82	11.635	303.58	12.595	24.855	486.805	39.105	145.725	168.81	67.33	200.86	5.925	22.46	3.51	31.37	21763.8	54.835	11.74	75.37	25.02	125.745	8.83	227.735	860.33
	22	1039.7	4.22	151.235	480.89	14.755	177.395	7768.48	329.53	999.38	5.705	27.195	18.785	0.68	30.36	14.165	564.67	872.77	422.885	264.33	11.055	16.855	2925.15	17.6	57.495	59.18	7.33	311.77	14.795	16.335	583.525	32.495	136.135	145.87	68.31	139.265	3.98	14.56	#VALUE!	16.315	18587.9	30.745	12.115	54.09	26.235	65.515	26.745	367.805	863.05
	23	347.185	1.575	59.505	141.74	7.145	106.165	4049.49	147.895	521.435	6.325	58.255	29.635	0.845	70.68	18.28	798.13	297.59	132.05	310.075	14.215	34.535	2551.72	19.115	45.695	123.505	10.65	488.845	13.7	33.56	487.04	28.785	209.43	172.41	106.585	295.445	12.245	62.56	6.435	42.615	41975.7	84.665	13.81	111.695	29.45	179.655	11.815	133.65	345.19
	24	449.945	1.905	61.465	276.36	8.89	55.295	5404.98	98.185	595.895	5.14	44.515	17.735	0.61	43.28	16.365	548.41	731.28	806.605	334.87	10.07	28.43	7157.11	14.99	46.205	68.565	15.485	311.03	12.685	23.87	494.2	37.85	157.07	185.72	57.675	176.46	3.655	9.76	3.645	18.165	24247.7	42.81	11.59	77.9	24.84	91.695	9.985	343.705	1858.18
* Note: 5,6-EET (5,6-epoxyeicosatrienoic acid) is a chemically unstable metabolite that can undergo rapid cyclization; as a result, the measured concentration of 5,6-EET may not accurately reflect its true abundance in mouse tissues.
[truncated: 8 more columns]

## Sheet: Fig.1f
The expression of genes involved in PG biosynthesis in mouse colon (Fold change, 2^(-ddCt))
Group	Mouse#	Pla2g4a	Cox-1	Cox-2	Ptges	Ptgds	Ptgfs
SPF	1	0.452728	0.431204	0.059339	0.946113	0.089417	3.49424
	2	2.8217	0.453092	0.099056	1.05369	0.055387	0.668329
	3	0.088957	0.231095	1.31231	1.02035	1.94062	1.3376
	4	0.355534	1.86259	0.304884	1.69901	0.325491	0.61334
	5	0.136475	1.087	2.60813	0.269096	1.95324	0.228573
	6	0.305911	2.17411	0.950559	3.55187	0.464103	1.49207
	7	0.150886	1.86493	1.67034	0.061188	1.83783	0.376151
	8	0.093328	0.709766	2.53327	0.340921	2.20708	1.796
	9	0.082456	1.27547	1.67148	0.282255	2.21773	0.927295
	10	6.31455	0.396111	0.02143	1.10303	0.009492	0.717208
	11	0.893051	0.182485	0.208018	0.021164	0.150708	0.110448
	12	0.304421	1.33214	0.561192	1.65131	0.748908	0.238756
GF	13	2.19027	0.684915	0.123154	1.07649	0.048731	0.491455
	14	7.46885	0.739141	0.022669	1.53376	0.000521	0.837996
	15	0.801609	0.114898	0.020859	0.9471	0.023613	7.28331
	16	0.274114	0.157114	0.048576	0.518125	0.09098	0.080525
	17	4.86361	1.67948	0.008477	3.16884	0.001389	0.420173
	18	5.42715	0.27066	0.045433	0.91201	0.016205	0.507592
	19	0.519168	0.291092	4.99606	0.04792	1.66108	1.86242
	20	7.32465	0.353687	0.027241	1.4104	0.004456	1.06453
	21	0.100407	0.20458	3.24133	0.021493	1.85473	1.08459
	22	0.090657	1.64179	1.74158	2.47077	2.91704	2.34041
	23	0.111528	0.038733	0.155537	0.209553	0.246839	1.66941
	24	3.53566	0.062596	0.169539	0.84205	0.079521	1.15743

## Sheet: Fig.2c
Peak area of Compound 1 in the colon tissues of GF and SPF mice (intensity)
Group	Mouse#	Compound 1 intensity
GF	1	3159
	2	0
	3	2728
	4	1564
	5	4659
	6	1099
	7	3628
	8	1786
	9	3091
	10	3602
	11	2026
	12	712
SPF	13	0
	14	0
	15	0
	16	0
	17	0
	18	0
	19	0
	20	0
	21	0
	22	0
	23	0
	24	0

## Sheet: Fig.2e
Peak area of PGE2-glucuronide in microbial strains and mammalian S9 fractions screening (intensity)
Group	Compound 1	Compound 2	Compound 3
Bact 43	0	0	0
Bact 45	150169402	0	0
Bact 49	156344939	0	0
Bact 52	50954856	77925092	3076570
Bact 53	36811	0	613805
Bact 58	32748159	0	0
Bact 59	0	0	0
Bact 60-A	3515	16846	462115
Bact 61-D	22244507	6538155	82646466
Bact 61-D-4	5922159	8615388	53721713
Bact 131	0	49453	256175
Bact 145	26116339	0	0
Bact 147	0	0	0
Bact 243	0	9181	462875
Bact 244	0	33461715	159504
Bact 245	22134247	151700827	1833264
Bact 246	341550633	570040568	33571270
Bact 247	51885	27371	558155
Bact 288	179231153	440261351	10429985
Bact HD037	96908198	0	0
Bact HD038	902122058	0	19357277
Bact HD041	396899585	0	10837705
Bact HD043	9687323	63259500	756520
Fun78	0	0	0
Hypha Pig S9	0	148250651	1927258
Hypha Lamb S9	780404	52026947	728377
Hypha Ox male S9	0	51328770	1180561
Hypha Horse female S9	191245205	107061458	12338400
Beagle Dog male S9	478071943	0	0
Rhesus Monkey male S9	475389750	0	0
Rhesus Monkey female S9	491175348	0	0
Cynomolgus Monkey male S9	244545267	124154259	0
Sprague-Dawley Rat male S9	95539125	207693751	0
Sprague-Dawley Rat female S9	24339088	267462514	0
Han Wistar Rat male S9	0	232660854	54442639
New Zealand Rabbit male S9	0	274100487	10795818
New Zealand Rabbit female S9	0	280693120	10286339
Mouse male S9	0	196420074	0
Mouse female S9	0	103425253	9895549
Human mixed S9	696277103	0	0
Human female S9	322677631	0	0
M3G (media control)	0	6873	702073
C95 (media control)	0	0	0

## Sheet: Fig.2g
Intestinal microsome convert PGE2 to PGE2-Acyl-GlcA
Group	Duplicate	PGE2-Acyl-GlcA (μg/L)
IM+UDP-GlcA+PGE2	A1	586.745
	A2	678.301
IM+UDP-GlcA	B1	0
	B2	0
IM+PGE2	C1	1.98788
	C2	1.8963
UDP-GlcA+PGE2	D1	0
	D2	0

## Sheet: Fig.2h
Mouse fecal bacteria catalyze the conversion of PGE2-Acyl-GlcA to PGE2 Concentration of PGE2 (nM)
Group	Duplicate	Incubation time (min)
		15	30	60	120	180	240
PGE2-Acyl-GlcA+Fecal Bacteria	A1	8.50497	11.0888	15.7642	25.5254	32.7062	38.3255
	A2	7.59902	8.19861	14.6754	25.1729	33.7556	36.6108
	A3	7.55435	9.54421	15.4755	24.4982	35.8119	32.5898
Ctrl (Fecal Bacteria alone)	B1	1.54732	1.75974	1.79762	1.19999	1.87996	1.82671
	B2	2.26407	1.45169	1.1132	0.861285	1.23162	1.38799
	B3	1.84219	2.9995	1.53681	1.1228	1.61195	1.21091
Crtl (PGE2-Acyl-GlcA alone)	C1	0.942306	1.11413	0.798374	1.2826	1.75707	2.36055
	C2	1.33257	1.52936	0.925259	1.3359	1.68261	2.56101
	C3	1.14156	0.852957	1.05484	1.67458	1.70386	2.06141

## Sheet: Fig.2i
Concentration of PGE2-Acyl-GlcA in mouse gut tissues (ng/g)
Group	Mouse#	Colon	Colon digesta	Cecum	Cecum digesta
SPF	1	0	13.97	0	0
	2	0	0	0	0
	3	0	0	0	0
	4	0	0	0	0
	5	0	0	0	0
	6	0	0	0	0
	7	0	0	0	0
	8	0	0	0	0
	9	0	0	0	0
	10	0	0	0	0
	11	0	0	0	0
	12	0	0	0	0
GF	13	39.69	33.04	66.46	73.27
	14	0	0	39.88	45.97
	15	30.15	25.72	34.02	72.59
	16	22.15	37.33	51.37	65.2
	17	54.68	51.31	61.78	85.85
	18	10.1	38.94	33.34	70.3
	19	48.31	51.93	50.78	62.68
	20	19.59	47.24	28.57	66.27
	21	45.44	54.68	27.26	68.43
	22	72.26	52.18	13.95	72.63
	23	34.9	44.46	20.12	54.2
	24	6.35	0	28.61	69.17

## Sheet: Fig.3b
Bacterial enzyme processing of PGE2-Acyl-GlcA
Group	Duplicate	PGE2 formation (%) 30 min incubation	PGE2 formation(%) 240 min incubation
Fecal Bacterial enz + PGE2-Acyl-GlcA	A1	95.9469	95.5034
	A2	95.1625	100.852
	A3	108.891	103.645
Fecal Bacterial enz + PGE2-Acyl-GlcA + D-SL (10 μM)	B1	2.98751	9.81109
	B2	3.92888	8.38036
	B3	5.77238	7.58551
Fecal Bacterial enz + PGE2-Acyl-GlcA + D-SL (100 μM)	C1	3.94849	2.21233
	C2	3.41897	2.98333
	C3	2.81101	3.03103
Fecal Bacterial enz + PGE2-Acyl-GlcA + PMSF (10 μM)	D1	106.407	89.7263
	D2	100.11	97.9954
	D3	141.202	106.953
Fecal Bacterial enz + PGE2-Acyl-GlcA + PMSF (100 μM)	E1	66.9723	105.242
	E2	113.697	106.356
	E3	110.715	100.384
Fecal Bacterial enz + PGE2-Acyl-GlcA + PMSF (1000 μM)	F1	84.8669	108.744
	F2	122.644	116.508
	F3	111.709	117.105

## Sheet: Fig.3c
Gut microbial GUS enzyme convert PGE2-Acyl-GlcA to PGE2
Group	Duplicate	PGE2 formed (pmol)
E. coli	A1	16.2018
	A2	15.5013
	A3	16.2174
C. perfringens	B1	15.9177
	B2	13.1196
	B3	16.323
R. gnavus	C1	14.0778
	C2	14.8269
	C3	14.6675
Eubacterium (UNC 361-28)	D1	11.4482
	D2	14.4476
	D3	14.3473
S. agalactiae	E1	15.2499
	E2	15.9753
	E3	6.52752
E. eligens	F1	9.80656
	F2	10.0813
	F3	9.40441
B. fragilis	G1	11.6659
	G2	9.83469
	G3	5.61695
F. saccharvivorans	H1	8.80118
	H2	8.80986
	H3	8.5369
B. mass	I1	6.19934
	I1	9.43046
	I3	8.9012
B. dorei	J1	5.38288
	J2	4.41083
	J3	4.59663
P. copri	K1	3.56902
	K2	4.32054
	K3	2.89911
R. hominis 1	L1	2.26973
	L2	3.09352
	L3	3.05494
F. prausnitzii	M1	1.70655
	M2	1.18524
	M3	0.940059
R. hominis 2	N1	0.780969
	N2	0.946866
	N3	1.05775
Parabacteroides MSP	O1	0.18341
	O2	0.202959
	O3	0.163407
B. angulatum	P1	0.072297
	P2	0.082306
	P3	0.081184
P. merdae	Q1	0.234947
	Q2	0.157156
	Q3	0.226994
B. ovatus	R1	0.311877
	R2	0.334999
	R3	0.107279
Control	S1	0.060573
	S2	0.082768
	S3	0.082351

## Sheet: Fig.4b
Concentrations of prostaglandins in mouse cecum (ng/g in cecum)
Group	Mouse#	PGE2	PGD2	TXB2	6-keto PGF1α	PGF2α	PGE3	PGD3	15-keto PGF2α	PGB2
GF mice + vehicle (PBS)	1	134.125	346.2	16.005	420.24	209.42	ND	ND	ND	ND
	2	344.395	665.32	24.825	1015.27	670.47	ND	ND	ND	ND
	3	261.03	751.07	11.885	300.19	269.315	ND	ND	ND	ND
	4	279.68	649.2	22.575	226.925	304.13	ND	ND	ND	ND
	5	229.99	679.935	13.23	191.375	274.895	ND	ND	ND	ND
	6	160.33	273.895	19.81	162.63	281.875	ND	ND	ND	ND
	7	330.975	567.055	23.47	446.465	335.29	ND	ND	ND	ND
	8	490.71	1164.56	31.315	209.535	440.395	ND	ND	ND	ND
	9	303.72	516.52	23.035	180.48	375.865	ND	ND	ND	ND
	10	517.905	977.475	25.725	360.025	764.625	ND	ND	ND	ND
GF mice + EcGUS enzyme	11	2593.57	4433.19	71.015	1115.62	482.34	ND	ND	ND	ND
	12	978.145	1525.02	30.155	591.425	349.54	ND	ND	ND	ND
	13	1971.33	3434.04	35.975	868.42	380.385	ND	ND	ND	ND
	14	1636.78	2309.11	37.925	1019.54	411.15	ND	ND	ND	ND
	15	511.205	644.505	55.38	1485.88	557.095	ND	ND	ND	ND
	16	1066.16	1302.41	30.745	496.475	457.165	ND	ND	ND	ND
	17	969.175	1488.93	31.16	376.58	365.625	ND	ND	ND	ND
	18	731.86	1250.32	25.145	356.575	467.675	ND	ND	ND	ND
	19	627.53	844.365	29.515	547.75	465.135	ND	ND	ND	ND
	20	1253.89	1608.31	40.76	350.765	526.625	ND	ND	ND	ND
Note: “ND” indicates not detected.

[truncated: 14 more sheets: Fig.4d, Fid.4f, Fig.4g, Fig.S2, Fig.S12, Fig.S13, Fig.S14, Fig.S16a, Fig.S16b, Fig.S19a, Fig.S19b, Fig.S20d, Fig.S21, Fig.S22]
